# Supplementary material for: High-resolution organic field-effect transistors manufactured by electrohydrodynamic inkjet printing of doped electrodes
Source: Royal Society of Chemistry journal article supplement (doi:10.1039/d0tc02508a), 2020-01-01
Supplement: d0tc02508a1.pdf [file d0tc02508a1.pdf]

## SUPPLEMENTARY INFORMATION

### **High-resolution organic field-effect transistors manufactured by electrohydrodynamic inkjet printing of doped electrodes**

Jing Zhang,<sup>a</sup> Bowen Geng,<sup>b</sup> Shuming Duan,<sup>a</sup> Congcong Huang,<sup>a</sup> Yue Xi,<sup>a</sup> Qi Mu,<sup>a</sup>  
Huipeng Chen,<sup>c</sup> Xiaochen Ren,<sup>\*a</sup> and Wenping Hu<sup>\*a</sup>

<sup>a</sup>Tianjin Key Laboratory of Molecular Optoelectronic Sciences. Department of  
Chemistry, School of Science, Tianjin University & Collaborative Innovation Center  
of Chemical Science and Engineering (Tianjin), Tianjin, 300072, China.

<sup>b</sup>School of Microelectronics, Tianjin University, Tianjin, 300072, China.

<sup>c</sup>Institute of Optoelectronic Display, National & Local United Engineering Lab of Flat  
Panel Display Technology, Fuzhou University, Fuzhou 350002, China.

\*Corresponding author:

Email: renxiaochen@tju.edu.cn; huwp@tju.edu.cn

## SUPPLEMENTARY FIGURES

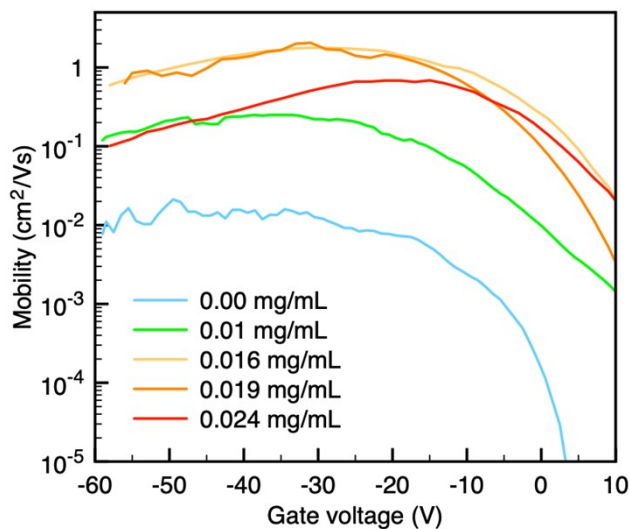

**Fig. S1.** Field-effect mobility of the OFET as a function of gate voltage.

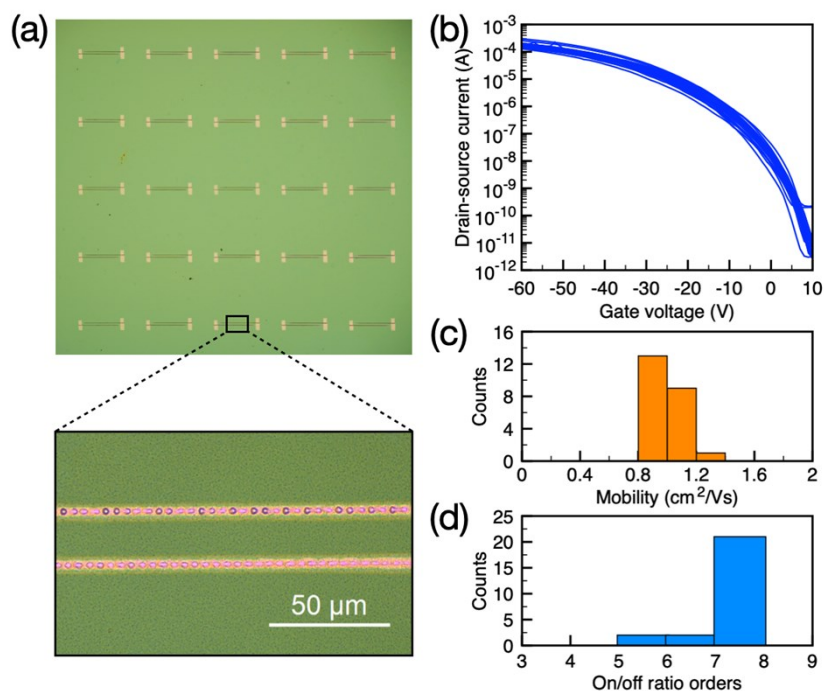

**Fig. S2.** (a) Optical microscopy image of the printed DNTT  $5 \times 5$  array, inset is zoomed-in image of printed electrodes, the channel width and length of printed OFETs is 300 and 15  $\mu\text{m}$ , respectively. (b) 25 transfer I-V curves of the  $5 \times 5$  devices array. (c) A histogram of the saturation mobility of 25 OFETs. (d) A histogram of the on/off current ratio of 25 OFETs.
